# Supplementary material for: Evaluation of the In Vivo Biocompatibility of Amorphous Calcium Phosphate-Containing Metals
Source: MDPI journal article supplement (doi:10.3390/jfb11020045), 2020-06-23
Supplement: s1 [file s1]

Supplementary File

# Evaluation of the in Vivo Biocompatibility of Amorphous Calcium Phosphate-Containing Metals

**Table S1.** Semi-quantitative evaluation 1-week post-implantation. All collected data from the semi-quantitative evaluation utilized to evaluate the tissue reaction and biocompatibility as highlighted in ISO 10993-6. The values for each animal are a median of 5 sections evaluated per animal.

| 1 week                                          | SHAM |   |   |   |    | CHA  |    |    |    |    | ACPMetals |    |    |    |    |
|-------------------------------------------------|------|---|---|---|----|------|----|----|----|----|-----------|----|----|----|----|
| Animals                                         | 1    | 2 | 3 | 4 | 5  | 1    | 2  | 3  | 4  | 5  | 1         | 2  | 3  | 4  | 5  |
| Polymorphonuclear                               | 2    | 3 | 2 | 2 | 3  | 2    | 3  | 3  | 3  | 2  | 3         | 3  | 3  | 3  | 3  |
| Lymphocytes                                     | 0    | 0 | 0 | 0 | 0  | 0    | 1  | 1  | 1  | 1  | 3         | 3  | 3  | 3  | 3  |
| Plasma Cells                                    | 1    | 0 | 0 | 0 | 1  | 0    | 1  | 0  | 1  | 1  | 2         | 1  | 1  | 1  | 1  |
| Macrophages                                     | 2    | 1 | 1 | 2 | 1  | 2    | 2  | 2  | 2  | 2  | 3         | 3  | 3  | 3  | 3  |
| Giant Cells                                     | 0    | 0 | 0 | 0 | 0  | 1    | 2  | 2  | 1  | 2  | 0         | 2  | 1  | 1  | 2  |
| Necrosis                                        | 0    | 0 | 0 | 0 | 0  | 0    | 0  | 0  | 0  | 0  | 0         | 0  | 0  | 0  | 0  |
| Score from inflammatory cells<br>SUBTOTAL (X 2) | 10   | 8 | 6 | 8 | 10 | 10   | 18 | 16 | 16 | 16 | 22        | 24 | 22 | 22 | 24 |
| Neovascularization                              | 0    | 0 | 0 | 0 | 0  | 0    | 0  | 0  | 0  | 0  | 3         | 1  | 1  | 1  | 3  |
| Fibrosis                                        | 0    | 0 | 0 | 0 | 0  | 0    | 0  | 0  | 0  | 0  | 0         | 0  | 0  | 0  | 0  |
| Fatty infiltrate                                | 0    | 0 | 0 | 0 | 0  | 0    | 0  | 0  | 0  | 0  | 0         | 0  | 0  | 0  | 0  |
| Sub-total from tissue response                  | 0    | 0 | 0 | 0 | 0  | 0    | 0  | 0  | 0  | 0  | 3         | 1  | 1  | 1  | 3  |
| TOTAL                                           | 10   | 8 | 6 | 8 | 10 | 10   | 18 | 16 | 16 | 16 | 25        | 25 | 23 | 23 | 27 |
| AVERAGE                                         | 8,4  |   |   |   |    | 15,2 |    |    |    |    | 24,6      |    |    |    |    |
| RESULT<br>(Test - Control)                      | ---  |   |   |   |    | 6,8  |    |    |    |    | 9,4       |    |    |    |    |

**Table S2.** Semi-quantitative evaluation 3 weeks post-implantation. All collected data from the semi-quantitative evaluation utilized to evaluate the tissue reaction and biocompatibility as highlighted in ISO 10993-6. The values for each animal are a median of 5 sections evaluated per animal.

| 3 weeks                                         | SHAM |   |   |   |    | CHA |    |    |    |    | ACPMetals |    |    |    |    |
|-------------------------------------------------|------|---|---|---|----|-----|----|----|----|----|-----------|----|----|----|----|
| Animals                                         | 1    | 2 | 3 | 4 | 5  | 1   | 2  | 3  | 4  | 5  | 1         | 2  | 3  | 4  | 5  |
| Polymorphonuclear                               | 2    | 1 | 2 | 2 | 2  | 2   | 2  | 1  | 2  | 2  | 1         | 0  | 0  | 0  | 0  |
| Lymphocytes                                     | 0    | 0 | 0 | 0 | 0  | 0   | 0  | 1  | 0  | 0  | 3         | 2  | 3  | 3  | 3  |
| Plasma Cells                                    | 0    | 0 | 0 | 0 | 1  | 0   | 1  | 0  | 0  | 1  | 2         | 1  | 1  | 2  | 2  |
| Macrophages                                     | 1    | 1 | 1 | 1 | 2  | 2   | 2  | 2  | 1  | 1  | 3         | 3  | 3  | 3  | 3  |
| Giant Cells                                     | 0    | 0 | 0 | 0 | 0  | 2   | 2  | 1  | 2  | 1  | 3         | 3  | 3  | 3  | 3  |
| Necrosis                                        | 0    | 0 | 0 | 0 | 0  | 0   | 0  | 0  | 2  | 0  | 0         | 0  | 0  | 0  | 0  |
| Score from inflammatory cells<br>SUBTOTAL (X 2) | 6    | 4 | 6 | 6 | 10 | 12  | 14 | 10 | 14 | 10 | 24        | 18 | 20 | 22 | 22 |
| Neovascularization                              | 0    | 0 | 0 | 0 | 0  | 0   | 0  | 0  | 0  | 0  | 2         | 2  | 1  | 2  | 2  |
| Fibrosis                                        | 0    | 0 | 0 | 0 | 0  | 0   | 0  | 0  | 0  | 0  | 0         | 0  | 0  | 0  | 0  |
| Fatty infiltrate                                | 0    | 0 | 0 | 0 | 0  | 0   | 0  | 0  | 0  | 0  | 0         | 0  | 0  | 0  | 0  |
| Sub-total from tissue response                  | 6    | 4 | 6 | 6 | 10 | 0   | 0  | 0  | 0  | 0  | 2         | 2  | 1  | 2  | 3  |
| TOTAL                                           | 6    | 4 | 6 | 6 | 10 | 12  | 14 | 10 | 14 | 10 | 26        | 20 | 21 | 24 | 25 |
| AVERAGE                                         | 6,4  |   |   |   |    | 12  |    |    |    |    | 23,2      |    |    |    |    |
| RESULT<br>(Test - Control)                      | ---  |   |   |   |    | 5,6 |    |    |    |    | 11,2      |    |    |    |    |

**Table S3.** Semi-quantitative evaluation 9 weeks post-implantation. All collected data from the semi-quantitative evaluation utilized to evaluate the tissue reaction and biocompatibility as highlighted in ISO 10993-6. The values for each animal are a median of 5 sections evaluated per animal.

| 9 weeks                                         | SHAM |   |   |   |   | CHA  |    |    |    |    | ACPMetals |    |    |    |    |
|-------------------------------------------------|------|---|---|---|---|------|----|----|----|----|-----------|----|----|----|----|
| Animals                                         | 1    | 2 | 3 | 4 | 5 | 1    | 2  | 3  | 4  | 5  | 1         | 2  | 3  | 4  | 5  |
| Polymorphonuclear                               | 2    | 2 | 2 | 1 | 2 | 2    | 2  | 2  | 2  | 3  | 0         | 0  | 0  | 0  | 0  |
| Lymphocytes                                     | 0    | 0 | 0 | 0 | 0 | 0    | 0  | 1  | 0  | 0  | 2         | 2  | 2  | 2  | 2  |
| Plasma Cells                                    | 0    | 0 | 0 | 0 | 0 | 0    | 0  | 0  | 0  | 0  | 1         | 1  | 1  | 1  | 1  |
| Macrophages                                     | 1    | 1 | 0 | 1 | 1 | 2    | 2  | 2  | 1  | 2  | 2         | 2  | 2  | 2  | 3  |
| Giant Cells                                     | 0    | 0 | 0 | 0 | 0 | 1    | 2  | 1  | 2  | 2  | 2         | 3  | 2  | 3  | 2  |
| Necrosis                                        | 0    | 0 | 0 | 0 | 0 | 0    | 0  | 0  | 0  | 0  | 0         | 0  | 0  | 0  | 0  |
| Score from inflammatory cells<br>SUBTOTAL (X 2) | 6    | 6 | 4 | 4 | 6 | 10   | 12 | 12 | 10 | 14 | 14        | 16 | 14 | 16 | 16 |
| Neovascularization                              | 0    | 0 | 0 | 0 | 0 | 0    | 0  | 0  | 0  | 0  | 1         | 1  | 2  | 2  | 1  |
| Fibrosis                                        | 0    | 0 | 0 | 0 | 0 | 0    | 0  | 0  | 0  | 0  | 0         | 0  | 0  | 0  | 0  |
| Fatty infiltrate                                | 0    | 0 | 0 | 0 | 0 | 0    | 0  | 0  | 0  | 0  | 0         | 0  | 0  | 0  | 0  |
| Sub-total from tissue response                  | 0    | 0 | 0 | 0 | 0 | 0    | 0  | 0  | 0  | 0  | 1         | 1  | 2  | 2  | 1  |
| TOTAL                                           | 6    | 6 | 4 | 4 | 6 | 10   | 12 | 12 | 10 | 14 | 15        | 17 | 16 | 18 | 17 |
| AVERAGE                                         | 5,2  |   |   |   |   | 11,6 |    |    |    |    | 16,6      |    |    |    |    |
| RESULT<br>(Test - Control)                      | ---  |   |   |   |   | 6,4  |    |    |    |    | 5         |    |    |    |    |
